# Supplementary material for: Gender differences in the association between adverse events in childhood or adolescence and the risk of premature mortality
Source: Springer Nature journal article supplement (doi:10.1038/s41598-022-23443-y), 2022-11-09
Supplement: 41598_2022_23443_MOESM1_ESM.pdf [file 41598_2022_23443_MOESM1_ESM.pdf]

**Gender differences in the association between adverse events in childhood or adolescence and the risk of premature mortality**

Aline Fernanda de Souza, MSc<sup>1</sup>, Roberta de Oliveira Máximo, PhD<sup>1</sup>, Dayane Capra de Oliveira, PhD<sup>1</sup>, Paula Camila Ramírez, PhD<sup>1,2</sup>, Mariane Marques Luiz, MSc<sup>1</sup>, Maicon Luis Bicigo Delinocente<sup>3</sup>, MSc, Jair Licio Ferreira Santos, PhD<sup>4</sup>, Andrew Steptoe, PhD<sup>5</sup>, Cesar de Oliveira, PhD<sup>5</sup>, Tiago da Silva Alexandre, PhD<sup>1,3,5,6\*</sup>

**Affiliations:**

<sup>1</sup> Graduate Program in Physical Therapy, Federal University of São Carlos, São Carlos, Brazil.

<sup>2</sup> Escuela de Fisioterapia, Universidad Industrial de Santander, Bucaramanga, Colômbia

<sup>3</sup> Graduate Program in Gerontology, Federal University of São Carlos, São Carlos, Brazil.

<sup>4</sup> Department of Social Medicine, University of São Paulo, Ribeirão Preto, Brazil.

<sup>5</sup> Department of Epidemiology and Public Health, University College London, United Kingdom.

<sup>6</sup> Gerontology Department, Federal University of São Carlos, São Carlos, Brazil.

**\*Corresponding author:**

Department of Gerontology, Federal University of São Carlos, Rodovia Washington Luís, km 235, Sao Carlos, Sao Paulo 13565-905, E-mail: tiagoalexandre@ufscar.br / t.alexandre@ucl.ac.uk.

## Supplementary material

**Supplementary Table 1.** Socioeconomic, behavioral, clinical and functional characteristics among individuals included in study and excluded due to missing data at baseline, ELSA study (2006).

|                                                      | Included<br>(N = 941) | Excluded<br>(N = 834) |
|------------------------------------------------------|-----------------------|-----------------------|
| <b>Socioeconomic aspects</b>                         |                       |                       |
| Age (mean), (SD)                                     | 82.9 (8.0)*           | 81.2 (10.9)*          |
| Race (non-white), %                                  | 0.6                   | 1.7                   |
| Marital status (single), %                           | 45.7*                 | 55.3*                 |
| Education years, %                                   |                       |                       |
| >13 years                                            | 21.9                  | 23.0                  |
| 12 – 13 years                                        | 18.7                  | 18.5                  |
| 0 – 11 years                                         | 59.4                  | 58.5                  |
| Total household wealth (quintiles), %                |                       |                       |
| 5 <sup>th</sup> quintile (top)                       | 14.9                  | 13.1                  |
| 4 <sup>th</sup> quintile                             | 20.3*                 | 14.4*                 |
| 3 <sup>rd</sup> quintile                             | 21.4                  | 20.1                  |
| 2 <sup>nd</sup> quintile                             | 19.9                  | 20.5                  |
| 1 <sup>st</sup> First quintile (lower)               | 22.4*                 | 29.9*                 |
| Not declared                                         | 1.1                   | 2.0                   |
| <b>Health behaviors</b>                              |                       |                       |
| Smoking, %                                           |                       |                       |
| Non-smoker                                           | 31.6                  | 28.1                  |
| Ex-smoker                                            | 52.7                  | 52.2                  |
| Smoker                                               | 15.7                  | 19.7                  |
| Alcohol intake, %                                    |                       |                       |
| Never or rarely                                      | 23.0                  | 22.5                  |
| Frequently                                           | 38.0*                 | 27.6*                 |
| Daily                                                | 25.7                  | 22.3                  |
| Not declared                                         | 13.3*                 | 27.6*                 |
| Sedentary lifestyle (yes), %                         | 12.0*                 | 17.0*                 |
| <b>Health conditions</b>                             |                       |                       |
| Stroke (yes), %                                      | 9.0                   | 10.1                  |
| Heart disease (yes), %                               | 37.4                  | 35.4                  |
| Lung disease (yes), %                                | 17.8                  | 20.5                  |
| Cancer (yes), %                                      | 8.5*                  | 8.4*                  |
| Osteoporosis (yes), %                                | 12.6                  | 11.0                  |
| Dementia (yes), %                                    | 0.6                   | 1.4                   |
| Emotional/psychiatric problems (yes), %              | 4.9*                  | 8.2*                  |
| Hypertension, (yes) %                                | 55.1                  | 54.5                  |
| Diabetes mellitus (yes), %                           | 16.7                  | 13.7                  |
| Fall in last 12 months (yes), %                      | 35.4                  | 39.5                  |
| Depressive symptoms (yes), %                         | 17.3*                 | 24.5*                 |
| <b>Functioning</b>                                   |                       |                       |
| Basic activities of daily living, (mean) (SD)        | 0.6 (1.2)             | 0.7 (1.2)             |
| Instrumental activities of daily living, (mean) (SD) | 0.6 (1.0)*            | 0.7 (1.2)*            |

Note. \* Differences between included and excluded ( $p < 0.05$ ).

**Supplementary Table 2.** Adverse events in childhood or adolescence among individuals included in study and excluded due to missing data at baseline, ELSA study (2006).

|                                                                                   | <b>Included<br/>(N = 941)</b> | <b>Excluded<br/>(N = 834)</b> |
|-----------------------------------------------------------------------------------|-------------------------------|-------------------------------|
| <b>Childhood or adolescence socioeconomic characteristics</b>                     |                               |                               |
| Family structure, %                                                               |                               |                               |
| Both biological parents                                                           | 90.8*                         | 78.3*                         |
| Mother and stepfather/father and stepmother                                       | 1.9                           | 2.4                           |
| Only father or mother                                                             | 4.2*                          | 11.2*                         |
| Others                                                                            | 3.1*                          | 8.1*                          |
| Occupation of head of household (low occupational class), %                       | 36.8                          | 40.5                          |
| Housing conditions, %                                                             |                               |                               |
| 5 amenities                                                                       | 1.4                           | 1.9                           |
| 4 amenities                                                                       | 37.4                          | 38.9                          |
| 3 amenities                                                                       | 13.6                          | 13.6                          |
| 2 amenities                                                                       | 10.7                          | 9.1                           |
| 1 amenity                                                                         | 28.9                          | 25.9                          |
| 0 amenities                                                                       | 8.0                           | 10.6                          |
| Number of rooms in home (mean), (SD)                                              | 5.2 (2.0)                     | 5.2 (2.0)                     |
| Number of residents in home (mean), (SD)                                          | 2.9 (0.9)                     | 2.9 (0.9)                     |
| <b>Stress in childhood or adolescence<br/>– Parental Bonding Instrument (PBI)</b> |                               |                               |
| Care from mother (mean), (SD)                                                     | 7.2 (1.6)*                    | 6.7 (2.0)*                    |
| Care from father (mean), (SD)                                                     | 6.8 (1.8)*                    | 6.3 (1.9)*                    |
| Protection from mother (mean), (SD)                                               | 3.6 (1.9)                     | 3.9 (1.9)                     |
| Protection from father (mean), (SD)                                               | 3.5 (1.8)*                    | 3.7 (1.8)*                    |
| <b>Infectious disease in childhood or adolescence</b>                             |                               |                               |
| Infectious disease (yes), %                                                       | 87.4                          | 84.9                          |

*Note.* \* Differences between included and excluded ( $p < 0.05$ ).
